# Supplementary material for: Annotation and analysis of a large cuticular protein family with the R&R Consensus in Anopheles gambiae
Source: Springer Nature journal article supplement (doi:10.1186/1471-2164-9-22), 2008-01-18
Supplement: Additional file 5 [file 1471-2164-9-22-s5.pdf]

Supplementary Table 5. Comparison of *An. gambiae* and *D. melanogaster* orthologs.

| Ortholog pairs <sup>a</sup> | % similarity |                    | Chrom. | Mature AA | Signal | Triad start | % to start | #C | #M | #H | %H   | #K | %K  | #G | %G   | #A | %A   | %G+A | #P | %P   | #AAP | #Q | %Q  |
|-----------------------------|--------------|--------------------|--------|-----------|--------|-------------|------------|----|----|----|------|----|-----|----|------|----|------|------|----|------|------|----|-----|
|                             | total        | cons. <sup>b</sup> |        |           |        |             |            |    |    |    |      |    |     |    |      |    |      |      |    |      |      |    |     |
| <b>AgamCPR130</b>           | 53           | 70                 | X      | 334       | 20     | 20          | 6.0        |    |    | 38 | 11.4 | 14 | 4.2 | 26 | 7.8  | 76 | 22.8 | 30.5 | 29 | 8.7  | 1    | 12 | 3.6 |
| <b>DmelCpr92F</b>           |              |                    | 3R     | 364       | 17     | 20          | 5.5        |    |    | 54 | 14.8 | 8  | 2.2 | 41 | 11.3 | 68 | 18.7 | 29.9 | 25 | 6.9  | 1    | 15 | 4.1 |
| <b>AgamCPR129</b>           | 29           | 70                 | X      | 223       | 20     | diad 55     | 24.7       |    | 3  | 2  | 0.9  | 15 | 6.7 | 13 | 5.8  | 11 | 4.9  | 10.8 | 22 | 9.9  |      | 9  | 4   |
| <b>DmelCpr11A</b>           |              |                    | X      | 254       | 16     | diad 51     | 20.1       |    | 1  | 3  | 1.2  | 15 | 5.9 | 41 | 16.1 | 11 | 4.3  | 20.5 | 15 | 5.9  |      | 14 | 5.5 |
| <b>AgamCPR127</b>           | 55           | 80                 | X      | 208       | 16     | 23          | 11.1       |    |    | 6  | 2.9  | 8  | 3.8 | 15 | 7.2  | 15 | 7.2  | 14.4 | 26 | 12.5 |      | 23 | 11  |
| <b>DmelCpr97Eb</b>          |              |                    | 3R     | 215       | 20     | 24          | 11.2       |    |    | 5  | 2.3  | 12 | 5.6 | 16 | 7.4  | 11 | 5.1  | 12.6 | 30 | 14.0 |      | 20 | 9.3 |
| <b>AgamCPR126</b>           | 47           | 98                 | X      | 338       | 19     | 40          | 11.8       |    |    | 12 | 3.6  | 17 | 5.0 | 23 | 6.8  | 36 | 10.7 | 17.5 | 54 | 16.0 | 4    | 43 | 13  |
| <b>DmelCpr97Ea</b>          |              |                    | 3R     | 344       | 19     | 50          | 14.5       |    |    | 5  | 1.5  | 10 | 2.9 | 30 | 8.7  | 32 | 9.3  | 18.0 | 56 | 16.3 | 1    | 41 | 12  |
| <b>AgamCPR125</b>           | 66           | 84                 | X      | 211       | 16     | monad 24    | 11.4       |    |    | 6  | 2.8  | 6  | 2.8 | 17 | 8.1  | 23 | 10.9 | 19.0 | 33 | 15.6 | 2    | 25 | 12  |
| <b>DmelCpr100A</b>          |              |                    | 3R     | 225       | 16     | monad 25    | 11.1       |    |    | 5  | 2.2  | 6  | 2.7 | 16 | 7.1  | 18 | 8.0  | 15.1 | 34 | 15.1 |      | 42 | 19  |
| <b>AgamCPR9</b>             | 50           | 75                 | 2R     | 182       | 17     | 33          | 18.1       |    |    | 10 | 5.5  | 10 | 5.5 | 9  | 4.9  | 23 | 12.6 | 17.6 | 13 | 7.1  |      | 9  | 4.9 |
| <b>DmelCpr57A</b>           |              |                    | 2R     | 169       | 15     | 17          | 10.1       |    |    | 15 | 8.9  | 5  | 3.0 | 10 | 5.9  | 30 | 17.8 | 23.7 | 10 | 5.9  |      | 15 | 8.9 |
| AgamCPR114                  | 48           | 84                 | 2R     | 147       | 17     | 59          | 40.1       |    |    | 13 | 8.8  | 8  | 5.4 | 10 | 6.8  | 25 | 17.0 | 23.8 | 14 | 9.5  | 2    | 1  | 0.7 |
| DmelCpr64Ac                 |              |                    | 3L     | 170       | 18     | 74          | 43.5       |    |    | 4  | 2.4  | 11 | 6.5 | 13 | 7.6  | 35 | 20.6 | 28.2 | 17 | 10.0 | 4    | 3  | 1.8 |
| AgamCPR116                  | 55           | 84                 | 2R     | 107       | 21     | 21          | 19.6       |    |    |    |      | 2  | 1.9 | 8  | 7.5  | 15 | 14.0 | 21.5 | 12 | 11.2 |      | 5  | 4.7 |
| DmelCpr64Ab                 |              |                    | 3L     | 101       | 19     | 23          | 22.8       |    |    | 1  | 1.0  | 2  | 2.0 | 8  | 7.9  | 14 | 13.9 | 21.8 | 11 | 10.9 |      | 5  | 5   |
| AgamCPR124                  | 51           | 88                 | 2R     | 226       | 18     | 138         | 61.1       |    |    |    |      | 6  | 2.7 | 5  | 2.2  | 73 | 32.3 | 34.5 | 26 | 11.5 | 10   | 7  | 3.1 |
| DmelCpr64Ad                 |              |                    | 3L     | 228       | 19     | 127         | 55.7       |    |    | 1  | 0.4  | 6  | 2.6 | 12 | 5.3  | 64 | 28.1 | 33.3 | 35 | 15.4 | 12   | 4  | 1.8 |
| <b>AgamCPR138</b>           | 31           | 51                 | 2L     | 385       | 18     | 303         | 78.7       | 2  | 5  | 10 | 2.6  | 32 | 8.3 | 40 | 10.4 | 20 | 5.2  | 15.6 | 47 | 12.2 |      | 15 | 3.9 |
| <b>Dmel(3)mbn</b>           |              |                    | 3L     | 629       | 24     | 551         | 87.6       | 2  | 4  | 12 | 1.9  | 38 | 6.0 | 89 | 14.1 | 59 | 9.4  | 23.5 | 45 | 7.2  | 1    | 25 | 4   |

| Ortholog pairs <sup>a</sup> | % similarity |                    | Chrom. | Mature AA | Signal | Triad start | % to start | #C | #M | #H | %H   | #K | %K  | #G  | %G   | #A  | %A   | %G+A | #P | %P   | #AAP | #Q | %Q  |
|-----------------------------|--------------|--------------------|--------|-----------|--------|-------------|------------|----|----|----|------|----|-----|-----|------|-----|------|------|----|------|------|----|-----|
|                             | total        | cons. <sup>b</sup> |        |           |        |             |            |    |    |    |      |    |     |     |      |     |      |      |    |      |      |    |     |
| AgamCPR135                  | 50           | 90                 | 2L     | 239       | 17     | 125         | 52.3       |    |    | 3  | 1.3  | 9  | 3.8 | 12  | 5.0  | 20  | 8.4  | 13.4 | 25 | 10.5 |      | 59 | 25  |
| DmelCpr66D                  |              |                    | 3L     | 251       | 19     | 139         | 55.4       |    |    | 5  | 2.0  | 12 | 4.8 | 14  | 5.6  | 15  | 6.0  | 11.6 | 20 | 8.0  |      | 57 | 23  |
| AgamCPR70                   | 73           | 98                 | 2L     | 123       | 16     | 38          | 30.9       |    | 9  | 11 | 8.9  | 7  | 5.7 | 7   | 5.7  | 17  | 13.8 | 19.5 | 12 | 9.8  | 1    | 3  | 2.4 |
| DmelCpr66Ca                 |              |                    | 3L     | 122       | 16     | 36          | 29.5       |    |    | 14 | 11.5 | 6  | 4.9 | 7   | 5.7  | 17  | 13.9 | 19.7 | 11 | 9.0  | 1    | 2  | 1.6 |
| AgamCPR144                  | 39           | 60                 | 2L     | 569       | 19     |             |            |    |    | 13 | 2.3  | 23 | 4.0 | 76  | 13.4 | 37  | 6.5  | 19.9 | 59 | 10.4 |      | 23 | 4   |
| DmelCpr73D                  |              |                    | 3L     | 564       | 27     |             |            |    | 3  | 14 | 2.5  | 12 | 2.1 | 101 | 17.9 | 43  | 7.6  | 25.5 | 36 | 6.4  |      | 13 | 2.3 |
| AgamCPR60                   | 70           | 95                 | 2L     | 123       | 17     | 53          | 43.1       |    |    | 15 | 12.2 | 6  | 4.9 | 17  | 13.8 | 7   | 5.7  | 19.5 | 5  | 4.1  |      | 5  | 4.1 |
| DmelCpr66Cb                 |              |                    | 3L     | 145       | 17     | 72          | 49.7       |    |    | 26 | 17.9 | 6  | 4.1 | 11  | 7.6  | 7   | 4.8  | 12.4 | 8  | 5.5  |      | 4  | 2.8 |
| AgamCPR59                   | 61           | 82                 | 2L     | 194       | 18     | 19          | 9.8        |    |    | 15 | 7.7  | 7  | 3.6 | 10  | 5.2  | 49  | 25.3 | 30.4 | 15 | 7.7  | 10   | 3  | 1.5 |
| DmelCpr62Bc                 |              |                    | 3L     | 162       | 18     | 36          | 22.2       |    |    | 22 | 13.6 | 4  | 2.5 | 16  | 9.9  | 34  | 21.0 | 30.9 | 11 | 6.8  | 5    | 2  | 1.2 |
| AgamCPR58                   | 56           | 90                 | 2L     | 147       | 22     | 14          | 9.5        |    |    | 15 | 10.2 | 8  | 5.4 | 11  | 7.5  | 16  | 10.9 | 18.4 | 11 | 7.5  | 1    | 3  | 2   |
| DmelCpr62Bb                 |              |                    | 3L     | 173       | 21     | 14          | 8.1        |    |    | 14 | 8.1  | 7  | 4.0 | 13  | 7.5  | 22  | 12.7 | 20.2 | 15 | 8.7  |      | 9  | 5.2 |
| AgamCPR141                  | 32           | 76                 | 2L     | 370       | 22     | 17          | 4.6        |    | 2  | 30 | 8.1  | 36 | 9.7 | 14  | 3.8  | 23  | 6.2  | 10.0 | 30 | 8.1  |      | 14 | 3.8 |
| DmelCpr76Bc                 |              |                    | 3L     | 404       | 20     | 36          | 8.9        |    | 6  | 28 | 6.9  | 37 | 9.2 | 24  | 5.9  | 20  | 5.0  | 10.9 | 36 | 8.9  |      | 19 | 4.7 |
| AgamCPR140                  | 34           | 82                 | 2L     | 837       | 19     | 760         | 90.8       | 1  |    | 7  | 0.8  | 42 | 5.0 | 35  | 4.2  | 196 | 23.4 | 27.6 | 76 | 9.1  | 9    | 7  | 0.8 |
| DmelCpr76Bd                 |              |                    | 3L     | 1211      | 18     | 1136        | 93.8       |    |    | 38 | 3.1  | 65 | 5.4 | 115 | 9.5  | 215 | 17.8 | 27.3 | 98 | 8.1  | 17   | 27 | 2.2 |
| AgamCPR132                  | 25           | 50                 | 3R     | 342       | 15     | 73          | 21.3       |    |    | 12 | 3.5  | 2  | 0.6 | 9   | 2.6  | 14  | 4.1  | 6.7  | 11 | 3.2  |      | 55 | 16  |
| DmelCry                     |              |                    | 2L     | 457       | 20     | 57          | 12.5       |    | 1  | 1  | 0.2  | 6  | 1.3 | 11  | 2.4  | 33  | 7.2  | 9.6  | 12 | 2.6  |      | 67 | 15  |
| AgamCPR147                  |              |                    | UNKN   | 163       | 18     | 80          | 49.1       |    | 1  | 1  | 0.6  | 2  | 1.2 | 23  | 14.1 | 7   | 4.3  | 18.4 | 12 | 7.4  |      | 9  | 5.5 |
| DmelCpr56F                  | 49           | 79                 | 2R     | 198       | 19     | 109         | 55.1       |    | 1  | 1  | 0.5  | 5  | 2.5 | 40  | 20.2 | 12  | 6.1  | 26.3 | 20 | 10.1 |      | 17 | 8.6 |

| Ortholog pairs <sup>a</sup> | % similarity |                    | Chrom. | Mature AA | Signal | Triad start | % to start | #C | #M | #H | %H   | #K | %K  | #G  | %G   | #A | %A  | %G+A | #P  | %P   | #AAP | #Q | %Q  |
|-----------------------------|--------------|--------------------|--------|-----------|--------|-------------|------------|----|----|----|------|----|-----|-----|------|----|-----|------|-----|------|------|----|-----|
|                             | total        | cons. <sup>b</sup> |        |           |        |             |            |    |    |    |      |    |     |     |      |    |     |      |     |      |      |    |     |
| AgamCPR146                  | 50           | 76                 | UNKN   | 134       | 19     | 54          | 40.3       |    | 1  | 4  | 3.0  | 7  | 5.2 | 15  | 11.2 | 8  | 6.0 | 17.2 | 16  | 11.9 |      | 12 | 9   |
| DmelCpr50Cb                 |              |                    | 2R     | 155       | 23     | 67          | 43.2       |    | 1  | 4  | 2.6  | 6  | 3.9 | 26  | 16.8 | 15 | 9.7 | 26.5 | 25  | 16.1 |      | 7  | 4.5 |
| AgamCPR152                  |              |                    | UNKN   | 289       | 28     | 83          | 28.7       |    | 1  | 58 | 20.1 | 7  | 2.4 | 35  | 12.1 | 8  | 2.8 | 14.9 | 1.6 | 0.6  |      | 6  | 2.1 |
| Dmelresilin                 | 31           | 76                 | 2R     | 603       | 17     | 328         | 54.4       |    | 1  | 1  | 0.2  | 5  | 0.8 | 210 | 34.8 | 29 | 4.8 | 39.6 | 64  | 10.6 |      | 32 | 5.3 |

<sup>a</sup>Names of RR-1 proteins are bolded in green; <sup>b</sup>Consensus; Pairs of cells that are highlighted in gray have percentages that differ by more than 50%.
